# Supplementary material
Source: PubMed Central journal article supplement (PMC5293151)
Supplement: NIHMS817294-supplement-supplement_1.pdf [file NIHMS817294-supplement-supplement_1.pdf]

**Supplemental table I.** Concurrent open procedures with corresponding Current Procedural Terminology (CPT) codes

| <b>CPT codes</b>             | <b>Definition CPT codes</b>                                                                                                                                       |
|------------------------------|-------------------------------------------------------------------------------------------------------------------------------------------------------------------|
| <b>Open bypass</b>           |                                                                                                                                                                   |
| 35556                        | Bypass graft, with vein; femoral-popliteal                                                                                                                        |
| 35565                        | Bypass graft, with vein; iliofemoral                                                                                                                              |
| 35566                        | Bypass graft, with vein; femoral-anterior tibial, posterior tibial, peroneal artery or other distal vessels                                                       |
| 35570                        | Bypass graft, with vein; tibial-tibial, peroneal-tibial, or tibial/peroneal trunk-tibial                                                                          |
| 35571                        | Bypass graft, with vein; popliteal-tibial, -peroneal artery or other distal vessels                                                                               |
| 35583                        | In-situ vein bypass; femoral-popliteal □                                                                                                                          |
| 35585                        | In-situ vein bypass; femoral-anterior tibial, posterior tibial, or peroneal artery                                                                                |
| 35587                        | In-situ vein bypass; popliteal-tibial, peroneal                                                                                                                   |
| 35651                        | Bypass graft, with other than vein; aortofemoral-popliteal                                                                                                        |
| 35656                        | Bypass graft, with other than vein; femoral-popliteal                                                                                                             |
| 35661                        | Bypass graft, with other than vein; femoral-femoral                                                                                                               |
| 35665                        | Bypass graft, with other than vein; iliofemoral                                                                                                                   |
| 35666                        | Bypass graft, with other than vein; femoral-anterior tibial, posterior tibial, or peroneal artery                                                                 |
| 35671                        | Bypass graft, with other than vein; popliteal-tibial or -peroneal artery                                                                                          |
| <b>Thromboendarterectomy</b> |                                                                                                                                                                   |
| 35302                        | Thromboendarterectomy, including patch graft, if performed; superficial femoral artery                                                                            |
| 35303                        | Thromboendarterectomy, including patch graft, if performed; popliteal artery                                                                                      |
| 35304                        | Thromboendarterectomy, including patch graft, if performed; tibioperoneal trunk artery                                                                            |
| 35305                        | Thromboendarterectomy, including patch graft, if performed; tibial or peroneal artery, initial vessel                                                             |
| 35306                        | Thromboendarterectomy, including patch graft, if performed; each additional tibial or peroneal artery (List separately in addition to code for primary procedure) |
| 35351                        | Thromboendarterectomy, with or without patch graft; iliac                                                                                                         |
| 35355                        | Thromboendarterectomy, with or without patch graft; iliofemoral                                                                                                   |
| 35371                        | Thromboendarterectomy, with or without patch graft; common femoral                                                                                                |
| 35372                        | Thromboendarterectomy, with or without patch graft; deep (profunda) femoral                                                                                       |
| 35381                        | Thromboendarterectomy, with or without patch graft; femoral and/or popliteal, and/or tibioperoneal                                                                |

**Supplemental table II.** Indications of related unplanned readmissions based on NSQIP complication variables and International Classification of Diseases (ICD)-9 codes

| Variables                                                | NSQIP complication variables   | ICD-9 code | Definition ICD-9 code                                                                                                   |
|----------------------------------------------------------|--------------------------------|------------|-------------------------------------------------------------------------------------------------------------------------|
| <b>Limb-related readmission</b>                          |                                |            |                                                                                                                         |
| <b>Infection or wound complication</b>                   |                                |            |                                                                                                                         |
|                                                          | Superficial Incisional SSI     | 440.23     | Atherosclerosis of native arteries of the extremities with ulceration                                                   |
|                                                          | Deep Incisional SSI            | 440.24     | Atherosclerosis of native arteries of the extremities with gangrene                                                     |
|                                                          | Organ/Space SSI                | 681.10     | Unspecified cellulitis and abscess toe                                                                                  |
|                                                          | Wound Disruption               | 682.6      | Cellulitis and abscess of leg except foot                                                                               |
|                                                          |                                | 682.7      | Cellulitis and abscess of leg except toes                                                                               |
|                                                          |                                | 682.9      | Cellulitis and abscess of unspecified sites                                                                             |
|                                                          |                                | 686.9      | Unspecified local infection of skin and subcutaneous tissue                                                             |
|                                                          |                                | 707.15     | Ulcer of other part of foot                                                                                             |
|                                                          |                                | 730.07     | Acute osteomyelitis involving ankle and foot                                                                            |
|                                                          |                                | 785.4      | Gangrene                                                                                                                |
|                                                          |                                | 997.62     | Infection (chronic) of amputation stump                                                                                 |
|                                                          |                                | 998.30     | Disruption of wound                                                                                                     |
|                                                          |                                | 998.59     | Other postoperative infection                                                                                           |
|                                                          |                                | 998.83     | Non-healing surgical wound                                                                                              |
|                                                          |                                | L03.115    | Cellulitis of right lower limb                                                                                          |
| <b>Recurrent symptoms of peripheral vascular disease</b> |                                |            |                                                                                                                         |
|                                                          |                                | 440.20     | Atherosclerosis of native arteries of the extremities unspecified                                                       |
|                                                          |                                | 440.21     | Atherosclerosis of native arteries of the extremities with intermittent claudication                                    |
|                                                          |                                | 440.22     | Atherosclerosis of native arteries of the extremities with rest pain                                                    |
|                                                          |                                | 440.29     | Other atherosclerosis of native arteries of the extremities                                                             |
|                                                          |                                | 440.30     | Atherosclerosis of unspecified bypass graft                                                                             |
|                                                          |                                | 440.31     | Atherosclerosis of autologous vein bypass graft                                                                         |
|                                                          |                                | 440.4      | Chronic total occlusion of artery of the extremities                                                                    |
|                                                          |                                | 443.9      | Peripheral vascular disease unspecified                                                                                 |
|                                                          |                                | 444.22     | Arterial embolism and thrombosis of lower extremity                                                                     |
|                                                          |                                | 459.9      | Peripheral occlusion combined with diabetes                                                                             |
|                                                          |                                | 729.5      | Pain in limb                                                                                                            |
|                                                          |                                | 729.81     | Swelling of limb                                                                                                        |
| <b>Other vascular complications</b>                      |                                |            |                                                                                                                         |
|                                                          | Bleeding Requiring Transfusion | 338.18     | Other acute postoperative pain                                                                                          |
|                                                          | DVT Requiring Therapy          | 442.30     | Aneurysm of artery of lower extremity                                                                                   |
|                                                          |                                | 453.41     | Acute venous embolism and thrombosis of deep vessel of proximal lower extremity                                         |
|                                                          |                                | 996.1      | Mechanical complication of other vascular device, implant, and graft                                                    |
|                                                          |                                | 996.59     | Mechanical complication of other implant and internal device not elsewhere classified                                   |
|                                                          |                                | 996.74     | Other complications due to other vascular device, implant, and graft                                                    |
|                                                          |                                | 997.2      | Peripheral vascular complications not elsewhere classified                                                              |
|                                                          |                                | 997.69     | Other late amputation stump complication                                                                                |
|                                                          |                                | 998.11     | Hemorrhage complicating a procedure                                                                                     |
|                                                          |                                | 998.12     | Hematoma complicating a procedure                                                                                       |
|                                                          |                                | 998.13     | Seroma complicating a procedure                                                                                         |
|                                                          |                                | E878.5     | Amputation of limb(s) causing abnormal patient reaction or later complication without misadventure at time of operation |
|                                                          |                                | V49.75     | Below knee amputation status                                                                                            |

| Sepsis            |                                 |        |                                                                                                         |
|-------------------|---------------------------------|--------|---------------------------------------------------------------------------------------------------------|
|                   | Sepsis<br>Septic Shock          | 038.9  | Unspecified septicemia (sepsis)                                                                         |
| Other readmission |                                 |        |                                                                                                         |
|                   | Pneumonia                       | 250.60 | Diabetes with neurological manifestations, type II or unspecified type, not stated as uncontrolled      |
|                   | Pulmonary Embolism              | 250.70 | Diabetes with peripheral circulatory disorders, type II or unspecified type, not stated as uncontrolled |
|                   | On ventilator > 48 hours        | 250.80 | Diabetes with other specified manifestations, type II or unspecified type, not stated as uncontrolled   |
|                   | Myocardial Infarction           | 285.9  | Anemia, unspecified                                                                                     |
|                   | Cardiac Arrest Requiring CPR    | 427.31 | Atrial fibrillation                                                                                     |
|                   | CVA                             | 428.0  | Congestive heart failure                                                                                |
|                   | Acute Renal Failure             | 428.21 | Acute systolic heart failure                                                                            |
|                   | Progressive Renal Insufficiency | 428.33 | Acute on chronic diastolic heart failure                                                                |
|                   | Urinary Tract Infection         | 442.90 | Other aneurysm of unspecified site                                                                      |
|                   |                                 | 444.00 | Other arterial embolism and thrombosis of abdominal aorta                                               |
|                   |                                 | 458.29 | Other iatrogenic hypotension                                                                            |
|                   |                                 | 459.0  | Hemorrhage unspecified                                                                                  |
|                   |                                 | 491.21 | Obstructive chronic bronchitis with (acute) exacerbation                                                |
|                   |                                 | 507.0  | Pneumonitis due to inhalation of food or vomitus                                                        |
|                   |                                 | 518.81 | Acute respiratory failure                                                                               |
|                   |                                 | 531.40 | Chronic or unspecified gastric ulcer with hemorrhage without obstruction                                |
|                   |                                 | 557.0  | Acute vascular insufficiency of intestine                                                               |
|                   |                                 | 569.85 | Angiodysplasia of intestine with hemorrhage                                                             |
|                   |                                 | 578.00 | Hematemesis                                                                                             |
|                   |                                 | 578.9  | Hemorrhage of gastrointestinal tract, unspecified                                                       |
|                   |                                 | 730.0  | Acute osteomyelitis site unspecified                                                                    |
|                   |                                 | 780.20 | Syncope and collapse                                                                                    |
|                   |                                 | 780.60 | Fever, unspecified                                                                                      |
|                   |                                 | 786.05 | Shortness of breath                                                                                     |
|                   |                                 | 786.09 | Respiratory abnormality other                                                                           |
|                   |                                 | 786.5  | Chest pain, unspecified                                                                                 |
|                   |                                 | 878.50 | Open wound of vulva complicated                                                                         |
|                   |                                 | 790.01 | Precipitous drop in hematocrit                                                                          |
|                   |                                 | 965.09 | Poisoning by other opiates and related narcotics                                                        |
